# Supplementary material
Source: PubMed Central journal article supplement (PMC3389226)

Fig. S1

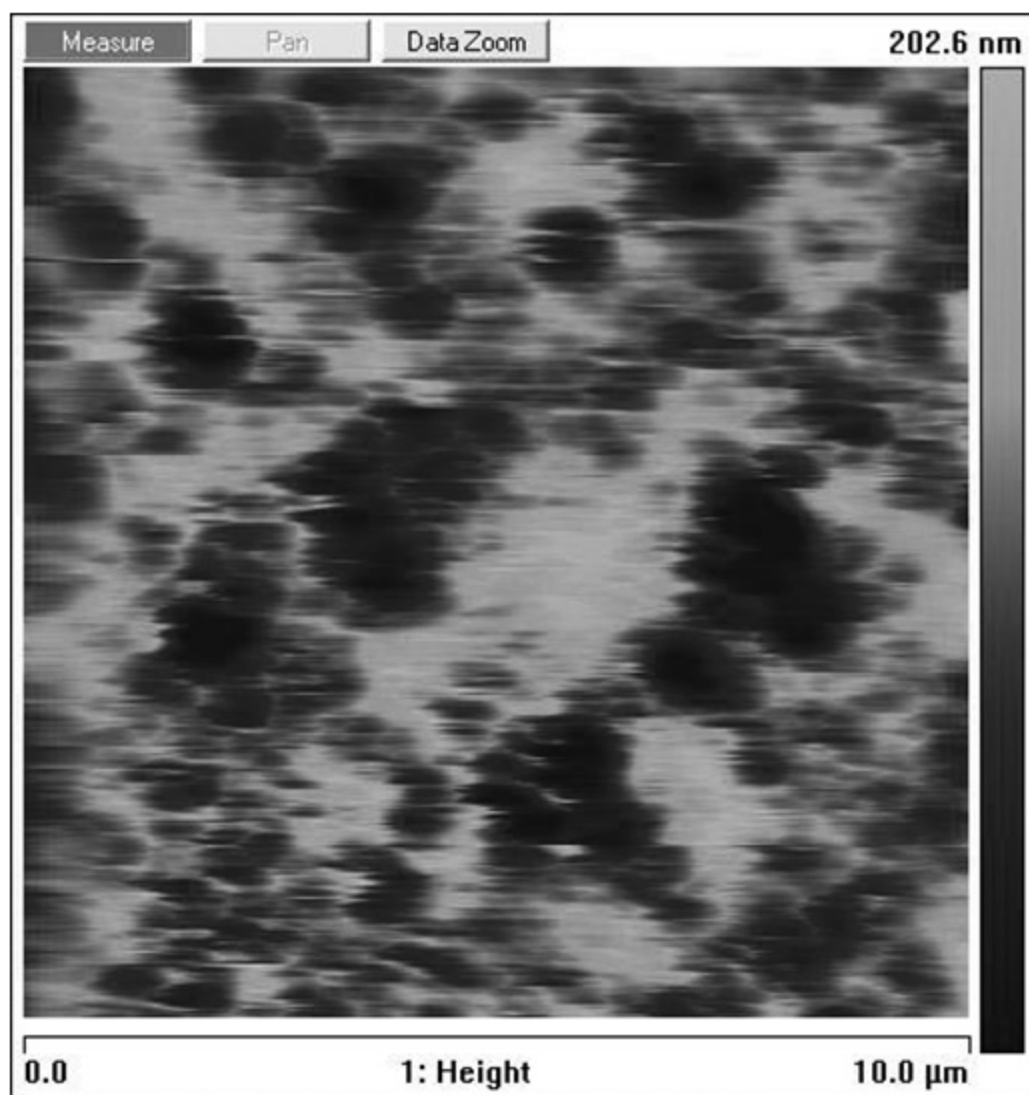

Supplement: NIHMS375584-supplement-Fig__S1.pdf [file NIHMS375584-supplement-Fig__S1.pdf]
